# Supplementary material for: Association of a Novel Homozygous Variant in ABCA1 Gene with Tangier Disease
Source: MDPI journal article supplement (doi:10.3390/jcm12072596), 2023-03-30
Supplement: s1 [file s1]

**Table S1. *In silico* analysis to predict *ABCA1* variant pathogenicity according to AMCG guidelines**

| Variants<br><i>ABCA1</i><br>(NM_005502.4) | Inheritance      | Population frequencies |      |              | Conservation Scores |              |                 | Prediction Pathogenicity Scores |                 |        |
|-------------------------------------------|------------------|------------------------|------|--------------|---------------------|--------------|-----------------|---------------------------------|-----------------|--------|
|                                           |                  | gnomAD                 | ExAC | 1000 Genomes | GERP                | PhyloP100way | PhastCons100way | DANN                            | Mutation Taster | FATHMM |
| c.4799A>G                                 | Mother<br>Father | -                      | -    | -            | 5.20                | 8.017        | 1.000           | 0.9984                          | DC              | D      |

*DC: Disease causing; D: Damaging; WT: Wild Type*
