# Supplementary material for: Association of a Novel Homozygous Variant in ABCA1 Gene with Tangier Disease
Source: MDPI journal article supplement (doi:10.3390/jcm12072596), 2023-03-30
Supplement: s1 [file s1]

**Table S2. Clinical Features and Diagnostic Tests at Initial Presentation**

| Parameter                                          | ABCA1 mutations [genotype], protein             |                                                                      |
|----------------------------------------------------|-------------------------------------------------|----------------------------------------------------------------------|
|                                                    | [c.4799A>G], p. H1600R + [c.4799A>G], p. H1600R | [c.1758_1759insG], p.R587Afs*43 + [c.4799A>G], p.H1600R <sup>a</sup> |
| <b>Clinical features</b>                           |                                                 |                                                                      |
| Age (years)                                        | 59                                              | 33                                                                   |
| Sex                                                | Male                                            | Male                                                                 |
| Motor neuropathy                                   | Yes                                             | Yes                                                                  |
| Splenomegaly                                       | Yes                                             | Yes                                                                  |
| Thrombocytopenia                                   | Yes                                             | Yes                                                                  |
| Medical history of tonsillectomy                   | Yes                                             | Yes                                                                  |
| Orange-colored tonsils                             | Yes                                             | No                                                                   |
| Clubbing                                           | Yes                                             | No                                                                   |
| Hypertelorism                                      | No                                              | Yes                                                                  |
| Low set ears                                       | No                                              | Yes                                                                  |
| Wide spaced nipples                                | No                                              | Yes                                                                  |
| Cutaneous manifestations                           | Prurigo nodularis of Hyde                       | Multiple freckles                                                    |
| Coronary heart disease                             | No                                              | Yes                                                                  |
| Monoclonal gammopathy of undetermined significance | Yes                                             | No                                                                   |
| <b>Biochemical analysis (units)</b>                |                                                 |                                                                      |
| TC (mmol/L)                                        | 1.2                                             | 2.8                                                                  |
| LDL-C (mmol/L)                                     | 0.07                                            | 1.2                                                                  |
| TG (mmol/L)                                        | 2.3                                             | 3.2                                                                  |
| HDL-C (mmol/L)                                     | 0.02                                            | 0.14                                                                 |
| ApoB (g/L)                                         | 0.57                                            | N/A                                                                  |
| ApoAI (g/L)                                        | Undetectable                                    | <0.3                                                                 |
| Foamy macrophages                                  | Yes                                             | Yes                                                                  |

<sup>a</sup>; patient reported by Fasano et al.<sup>38</sup> who was compound heterozygous for a nucleotide substitution c.4799A>G (p. His1600Arg)
